# Supplementary material for: Terminal alkyne substituted O6-benzylguanine for versatile and effective syntheses of fluorescent labels to genetically encoded SNAP-tags
Source: Royal Society of Chemistry journal article supplement (doi:10.1039/c4ra17072e), 2015-01-01
Supplement: c4ra17072e1.pdf [file c4ra17072e1.pdf]

Supplementary Information

# Terminal Alkyne Substituted O<sup>6</sup>-Benzylguanine for Versatile and Effective Syntheses of Fluorescent Labels to Genetically Encoded SNAP Tags

Xinbo Song,<sup>†,a</sup> Chao Wang,<sup>†,a</sup> Zhuo Han,<sup>b</sup> Yongping Xu<sup>\*,b</sup> and Yi Xiao<sup>\*,a</sup>

*State Key Laboratory of Fine Chemicals, Dalian University of Technology, West Campus, 2 Linggong Road, Dalian 116024, China.*

<sup>†</sup> These two authors contribute equally

\* Corresponding authors: [xyp\\_dlut@126.com](mailto:xyp_dlut@126.com); [xiaoyi@dlut.edu.cn](mailto:xiaoyi@dlut.edu.cn)

All chemicals are obtained from commercial suppliers and used without further purification. The 400 (<sup>1</sup>H) MHz NMR and 100 (<sup>13</sup>C) MHz NMR spectra are registered at room temperature on a 400 MHz spectrometer using perdeuterated solvents as internal standard. Images are acquired with a confocal microscopy from OLYMPUS.

## 4-[2-Propynylmethoxy]benzyl alcohol .

It is synthesized according to the literature procedures.<sup>1</sup> 1,4-benzenedimethanol (3 g, 21.71 mmol ) is dissolved in 10 mL dry DMF, and NaH (1g) is added in small portions over 10min at 0°C. The mixture is stirred for 15min. Propargyl bromide (2.32 g 19.54 mmol) is added and the mixture is stirred for 1h at 25°C. The mixture is quenched with water, extracted with CH<sub>2</sub>Cl<sub>2</sub>, and purified by flash column chromatography with CH<sub>2</sub>Cl<sub>2</sub> to get 4-[Prop-2-ynylloxymethyl]-benzyl alcohol (2.68g, 15.21mmol, 70%).

## 1-(2-Amino-7H-purin-6-yl)-1-methyl-pyrrolidinium chloride

It is synthesized according to the literature procedures.<sup>2</sup> 6-Chloro-guanine (0.5g , 5.9 mmol)) is dissolved in 15 ml DMF at 50°C. After cooling to room temperature, 1-methyl-pyrrolidin (1.4 ml, 13.2 mmol) is added and the reaction mixture is stirred for 24 h. 2 ml of acetone are added to complete precipitation. The solid is filtered, washed with ether and dried in vacuo, yielding 0.55 g product ( 2.16 mmol, 71%).

## O<sup>6</sup>-[4-[2-propynylmethoxy]benzyl]guanine (PYBG).

4-[2-Propynylmethoxy]benzyl alcohol (662 mg, 7.33 mmol) is dissolved in 3 mL dry DMF, and NaH (65mg) is added in small portions over 3 min at 0°C. The mixture is stirred for 15 min. 1-(2-Amino-7H-purin-6-yl)-1-methyl-pyrrolidinium chloride (300 mg) and 4-dimethylaminopyridine (30 mg) are added and the mixture is stirred for 1h at 25°C. The mixture is quenched with 0.5 mL water and purified by flash column chromatography (gradient:CH<sub>2</sub>Cl<sub>2</sub>/CH<sub>3</sub>OH 40:1→15:1)to yield 255 mg **PYBG** (0.83 mmol, 72%). mp 111.1-112.9°C.<sup>1</sup>H NMR (400 MHz, DMSO) δ 11.60 (s, 1H), 6.99 (s, 1H), 6.64 (d, *J* = 7.8 Hz, 2H), 6.50 (d, *J* = 7.8 Hz, 2H), 5.45 (s, 2H), 4.63 (s, 2H), 3.68 (s, 2H), 3.33 (s, 2H), 2.65 (s, 1H). <sup>13</sup>C NMR (101 MHz, DMSO) δ 159.6 , 137.4 , 136.2 , 128.4 , 127.8 , 80.1 , 77.5 , 70.4 , 66.4 , 56.9 . m/z (FTMS+p ESI): Calcd [M+H]<sup>+</sup> for C<sub>16</sub>H<sub>16</sub>N<sub>5</sub>O<sub>2</sub>: 310.1299, found : 310.1295.

## PYBG-TMR.

6-Br-tetramethylrhodamine(6-Br-TMR) is synthesized according to literature procedures.<sup>3</sup>

A mixture of 6-Br-TMR(20 mg, 0.064 mmol), PPh<sub>3</sub> (5 mg, 0.02 mmol), PYBG (20 mg, 0.064mmol), Pd[P(C<sub>6</sub>H<sub>5</sub>)<sub>3</sub>]<sub>4</sub>(2 mg, 0.002mmol), CuI (1mg, 0.005mmol), and DMF/Triethylamine (1.5 mL/0.5 mL) are placed in a 10 mL round-bottomed flask with a magnetic stirrer bar under a nitrogen atmosphere. The mixture is heated at 75°C for 4 h. Then the mixture is purified by column chromatography(gradient:CH<sub>2</sub>Cl<sub>2</sub>/CH<sub>3</sub>OH 40:1→8:1) to yield 35mg **PYBG-TMR** (0.05mmol, 78%). mp More than 300°C. m/z (TOF-LD+): Calcd [M+H]<sup>+</sup> for C<sub>40</sub>H<sub>36</sub>N<sub>7</sub>O<sub>5</sub>: 694.2778, found : 694.2833. The resolutions of <sup>1</sup>H NMR and <sup>13</sup>C NMR spectra are not very satisfactory due to the extremely poor solubility of **PYBG-TMR** in CDCl<sub>3</sub>, CD<sub>3</sub>OD, and DMSO-*d*<sub>6</sub> etc. The purity is measured by HPLC is 94.4%.

**PYBG-BODIPY** 4,4-difluoro-8-[4-[[3-azidopropoxy]phenyl]]-1,3,5,7-teramethyl-4-bora-3a,4a-diazaindacene is synthesized according to literature procedures.<sup>4</sup>

A mixture of **BODIPY**(20mg, 0.05mmol), **PYBG**(15mg, 0.05mmol) and N,N-Diisopropylethylamine(0.05ml, 0.28mmol) are dissolved in 3mL DMF under a nitrogen atmosphere. CuSO<sub>4</sub>·5H<sub>2</sub>O(2mg, 0.008mmol) dissolved in 0.5mL water is added and then sodium ascorbate dissolved in 0.5mL water is added. The mixture is stirred for 7h at 25°C. Then the mixture is purified by column chromatography (gradient:CH<sub>2</sub>Cl<sub>2</sub>/CH<sub>3</sub>OH 40:1→15:1) to yield 29mg **PYBG-BODIPY** (0.04mmol, 85%). mp 50.5-57.1°C. m/z (FTMS+p ESI): Calcd [M+H]<sup>+</sup> for C<sub>38</sub>H<sub>40</sub>N<sub>10</sub>F<sub>2</sub>O<sub>3</sub>B: 733.3340, found : 733.3342. The resolutions of <sup>1</sup>H NMR and <sup>13</sup>C NMR spectra were not very satisfactory due to the extremely poor solubility of PYBG-BODIPY in CDCl<sub>3</sub>, CD<sub>3</sub>OD, and DMSO-*d*<sub>6</sub> etc. The purity is measured by HPLC is 99.1%.

### Plasmid Construction

pSNAP<sub>f</sub> vector and pSNAP<sub>f</sub>-H2B plasmid are obtained from New England Biolabs (NEB). pSNAP<sub>f</sub>-COX8A plasmid is constructed by insertion of mitochondrial targets sequence of cytochrome c oxidase subunit 8 (COX8A) to the N-terminus of SNAP (pSNAP<sub>f</sub> vector). The COX8A sequence is obtained from anneal of oligonucleotides according to literature procedure with minor modification.<sup>4</sup> The oligonucleotides Mito1-1 + Mito1-2 and Mito2-1 + Mito2-2 are annealed respectively to provide Mito1 and Mito2 dsDNAs. The dsDNAs are ligated and insert into pSNAP<sub>f</sub> vector at EcoR V and EcoR I sites. All the plasmids are amplified in E. coil DH5α competent cells, and pSNAP<sub>f</sub>-COX8A plasmid is verified by DNA sequencing.

Mito 1-1: ATCATGTCCGTCCTGACGCCGCTGCTGCTGCGGGGCTTGACAGGC

Mito 1-2: CCGGGCCGAGCCTGTCAAGCCCCGAGCAGCAGCGGCGTCAGGACGGACATGAT

Mito 2-1: TCGGCCCCGCGGCTCCCAGTGCCGCGGCCAAGATCCATTCGTTGGGGG

Mito 2-2: AATCCCCCAACGAATGGATCTTGGCGCGGCGGCACTGGGAGCCG

### Cell Culture and labeling

COS-7 cells (Cell Bank of Type Culture Collection of Chinese Academy of Sciences) are cultured in Dulbeco's modified Eagle's medium (DMEM,Gibco) supplemented with 10% fetal bovine serum (FBS, Hyclone) at 37°C in an atmosphere of 5% CO<sub>2</sub>/95% air (CO<sub>2</sub> incubator, Thermo Scientific). Cells are transiently transfected with pSNAP<sub>f</sub>-H2B plasmid or pSNAP<sub>f</sub>-COX8A plasmid by using Lipofectamine 2000 (Invitrogen) following the standard protocol. And stable transfection is established by G418 (Geneticin, Invitrogen) selection. Cells for imaging are seeded on 35 mm glass

bottom culture dishes ( $\Phi=20$  mm) and cultured for 24-48 h. The dyes PYBG-TMR and PYBG-BODIPY are dissolved in DMSO (1 mM) by vortexing for 3 min to used as the stock solution. And when the dyes are submitted for cell imaging study, the stock solution are mixed with preheated ( $37^{\circ}\text{C}$ ) culture medium (DMEM with 10%FBS) and pipetted up and down more than 10 times to obtain the labeling solution. Cell labelling is achieved by incubating with PYBG conjugated dyes: PYBG-TMR ( $3\ \mu\text{M}$ ) or PYBG-BODIPY ( $5\ \mu\text{M}$ ) for 30 min at  $37^{\circ}\text{C}$ , and washed with PBS ( $3\times 1\ \text{mL}$ ). After incubate for 2 h in DMEM (10% FBS), the medium is replaced with fresh DMEM (10% FBS) 30 min before imaging.

### Purified SNAP protein for kinetics of the reaction

The SNAP protein for kinetics research is achieved from purifying by a C-terminus fused HisTag according to literature procedure.<sup>6</sup> The SNAP coding sequence is cut from pSNAPf vector using EcoRI and XhoI restriction endonucleases. And the gene fragment is ligating in PET28a(+) (Novagen) using corresponding restriction sites. The PET28a-SNAP plasmid is transformed into *E. coli* strain BL-21(DE3), and the bacterial is grown in LB medium with  $50\ \mu\text{g}/\text{mL}$  Kanamycin at  $37\ ^{\circ}\text{C}$  to reach the optical density (OD<sub>600nm</sub>) of 0.8. Then, isopropyl- $\beta$ -D-thiogalactopyranoside (IPTG, 1 mM) is added for the inducing of the expression of SNAP-HisTag. The culture is grown at  $16\ ^{\circ}\text{C}$  for 12 h. The subsequent purification of SNAP-HisTag is totally based on the literature method<sup>6</sup> except a HisTrap HP (GE Healthcare) which is used for the purification. Finally, 6 mg purified SNAP-HisTag ( $80\ \mu\text{M}$  in 3 mL elution buffer) is obtained.

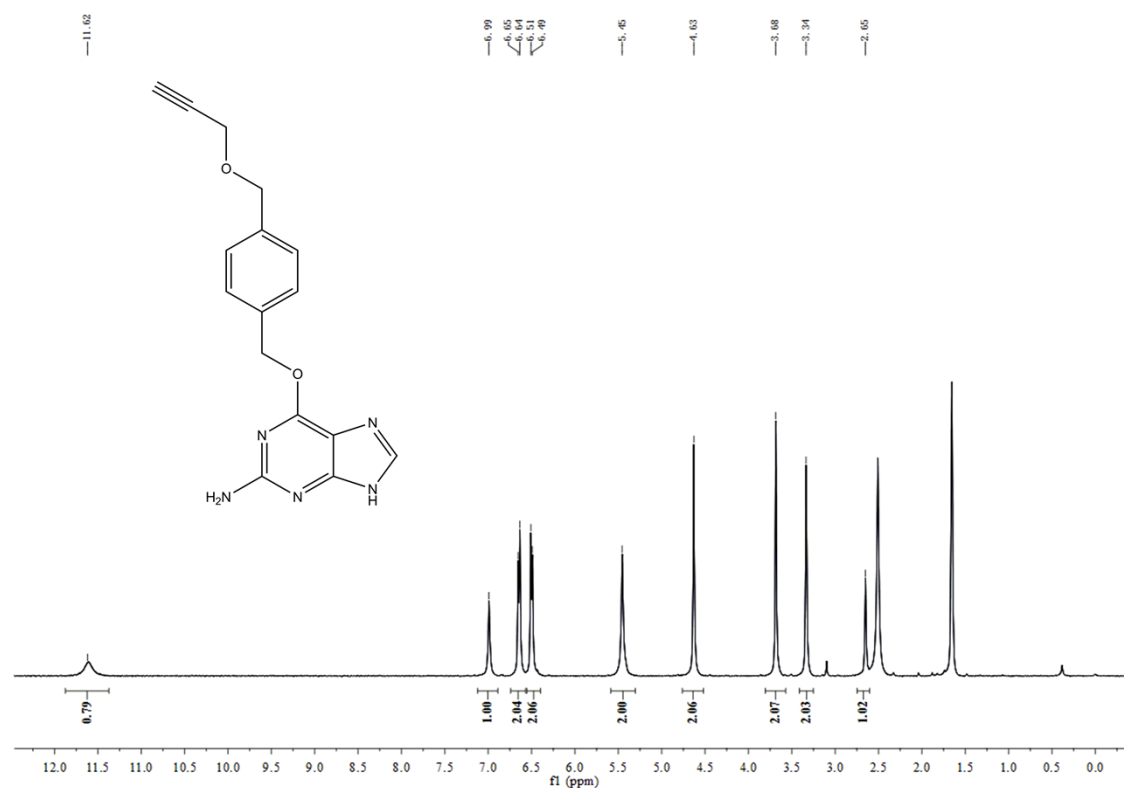

Figure 1. PYBG  $^1\text{H}$  NMR

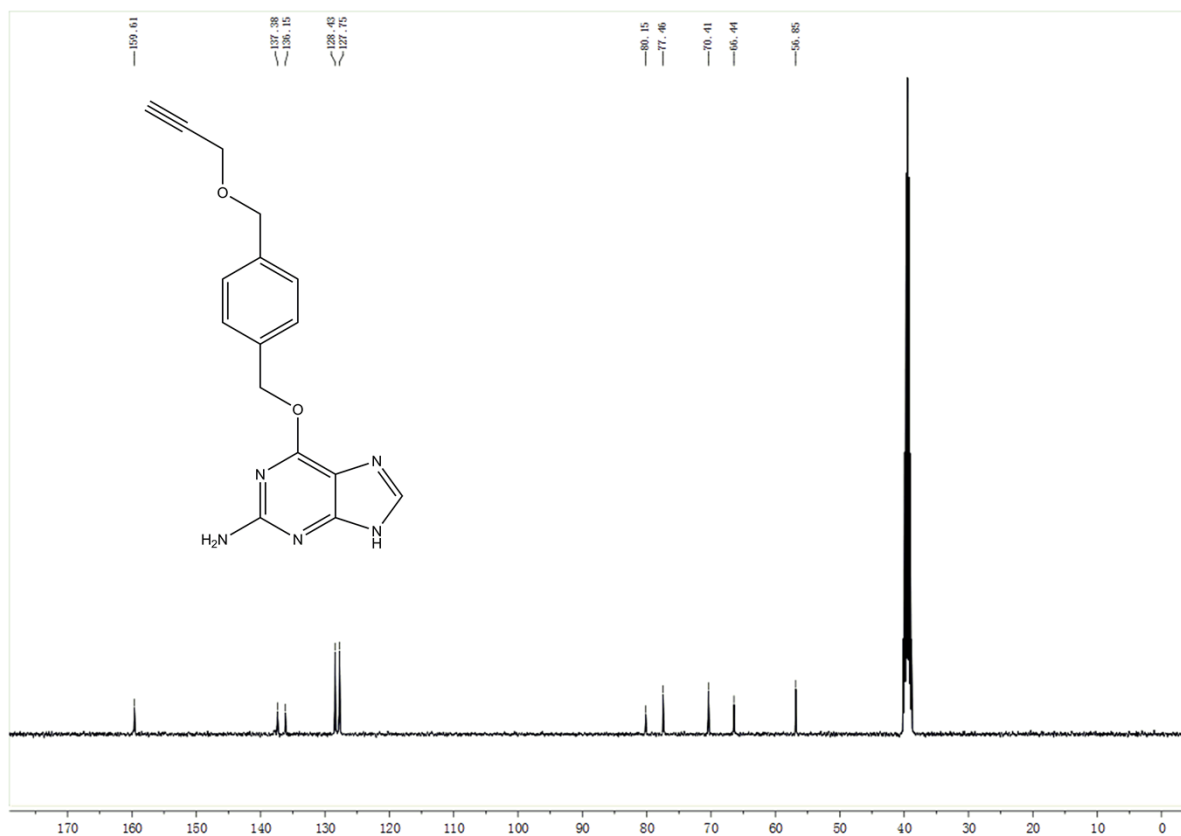

Figure 2. PYBG <sup>13</sup>C NMR

SXB-M732 #14-16 RT: 0.10-0.12 AV: 3 SB: 7 0.82-0.87 NL: 3.06E6  
 T: FTMS + p ESI Full ms [200.00-1000.00]

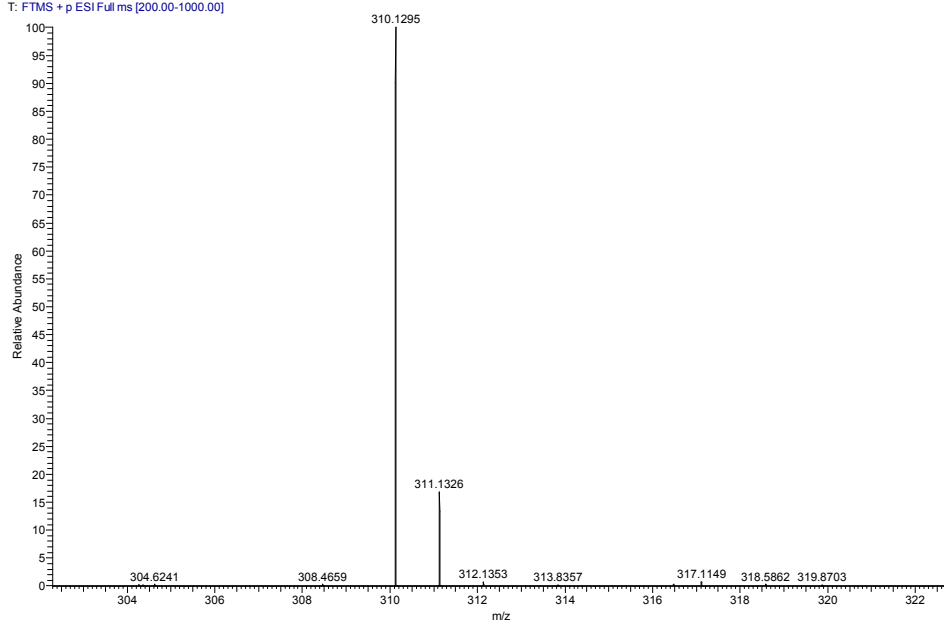

Figure 3. ESI ms Spectrum PYBG

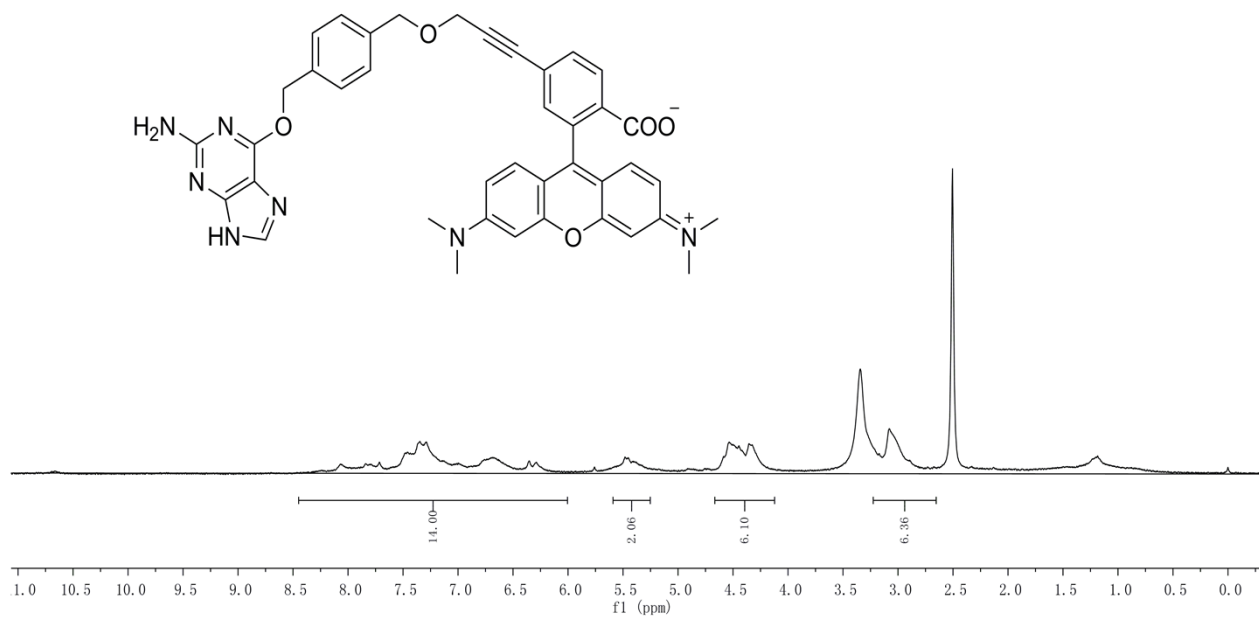

Figure4.PYBG-TMR <sup>1</sup>H NMR

## SAMPLE INFORMATION

|                                                                                                                                                              |                                                                                                                                                                                              |
|--------------------------------------------------------------------------------------------------------------------------------------------------------------|----------------------------------------------------------------------------------------------------------------------------------------------------------------------------------------------|
| Sample Name:    sxb<br>Sample Type:   Unknown<br>Vial:            29<br>Injection #:    1<br>Injection Volume: 2.00 ul<br>Run Time:       40.0 Minutes       | Acquired By:    System<br>Sample Set Name: 14070902<br>Acq. Method Set: 2A<br>Processing Method: 3<br>Channel Name:   254.0nm@2, 545.0nm@1<br>Proc. Chnl. Descr.: PDA 254.0 nm, PDA 545.0 nm |
| Date Acquired:   7/10/2014 3:33:59 PM CST    Project Name: H140707    Channel Id 1262<br>Date Processed:  7/10/2014 4:25:00 PM CST, 7/10/2014 4:26:00 PM CST |                                                                                                                                                                                              |

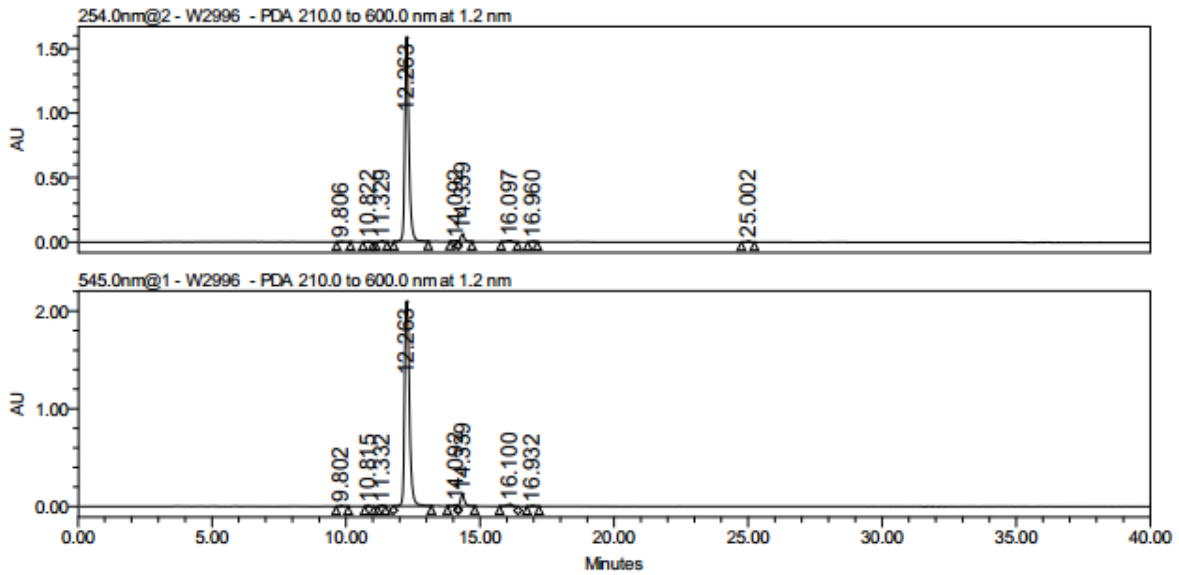

### Processed Channel Descr.: PDA 254.0 nm

|   | Processed Channel Descr. | RT     | Area     | % Area | Height  |
|---|--------------------------|--------|----------|--------|---------|
| 1 | PDA 254.0 nm             | 9.806  | 30474    | 0.17   | 2099    |
| 2 | PDA 254.0 nm             | 10.822 | 22259    | 0.13   | 2262    |
| 3 | PDA 254.0 nm             | 11.329 | 56249    | 0.32   | 6241    |
| 4 | PDA 254.0 nm             | 12.263 | 16590118 | 94.42  | 1586846 |
| 5 | PDA 254.0 nm             | 14.092 | 59885    | 0.34   | 6023    |
| 6 | PDA 254.0 nm             | 14.339 | 559655   | 3.19   | 56884   |
| 7 | PDA 254.0 nm             | 16.097 | 155446   | 0.88   | 10133   |
| 8 | PDA 254.0 nm             | 16.960 | 34151    | 0.19   | 3460    |
| 9 | PDA 254.0 nm             | 25.002 | 62350    | 0.35   | 5183    |

### Processed Channel Descr.: PDA 545.0 nm

|   | Processed Channel Descr. | RT    | Area  | % Area | Height |
|---|--------------------------|-------|-------|--------|--------|
| 1 | PDA 545.0 nm             | 9.802 | 65852 | 0.23   | 4972   |

Processed Channel Descr.: PDA 545.0 nm

|   | Processed Channel Descr. | RT     | Area     | % Area | Height  |
|---|--------------------------|--------|----------|--------|---------|
| 2 | PDA 545.0 nm             | 10.815 | 52426    | 0.19   | 5465    |
| 3 | PDA 545.0 nm             | 11.332 | 101296   | 0.36   | 10807   |
| 4 | PDA 545.0 nm             | 12.263 | 26241190 | 92.74  | 2095104 |
| 5 | PDA 545.0 nm             | 14.092 | 146147   | 0.52   | 12277   |
| 6 | PDA 545.0 nm             | 14.339 | 1241900  | 4.39   | 121647  |
| 7 | PDA 545.0 nm             | 16.100 | 355988   | 1.26   | 20274   |
| 8 | PDA 545.0 nm             | 16.932 | 91238    | 0.32   | 6796    |

Figure 5.HPLC spectrum PYBG-TMR

SXB(CHCA)

13091603 9 (0.149)

TOF LD+  
2.83e3

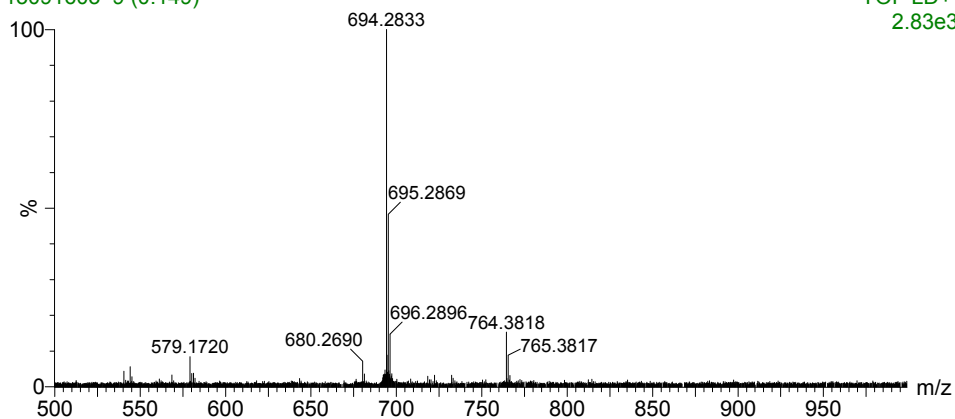

Figure 6.TOF LD+ ms Spectrum PYBG-TMR

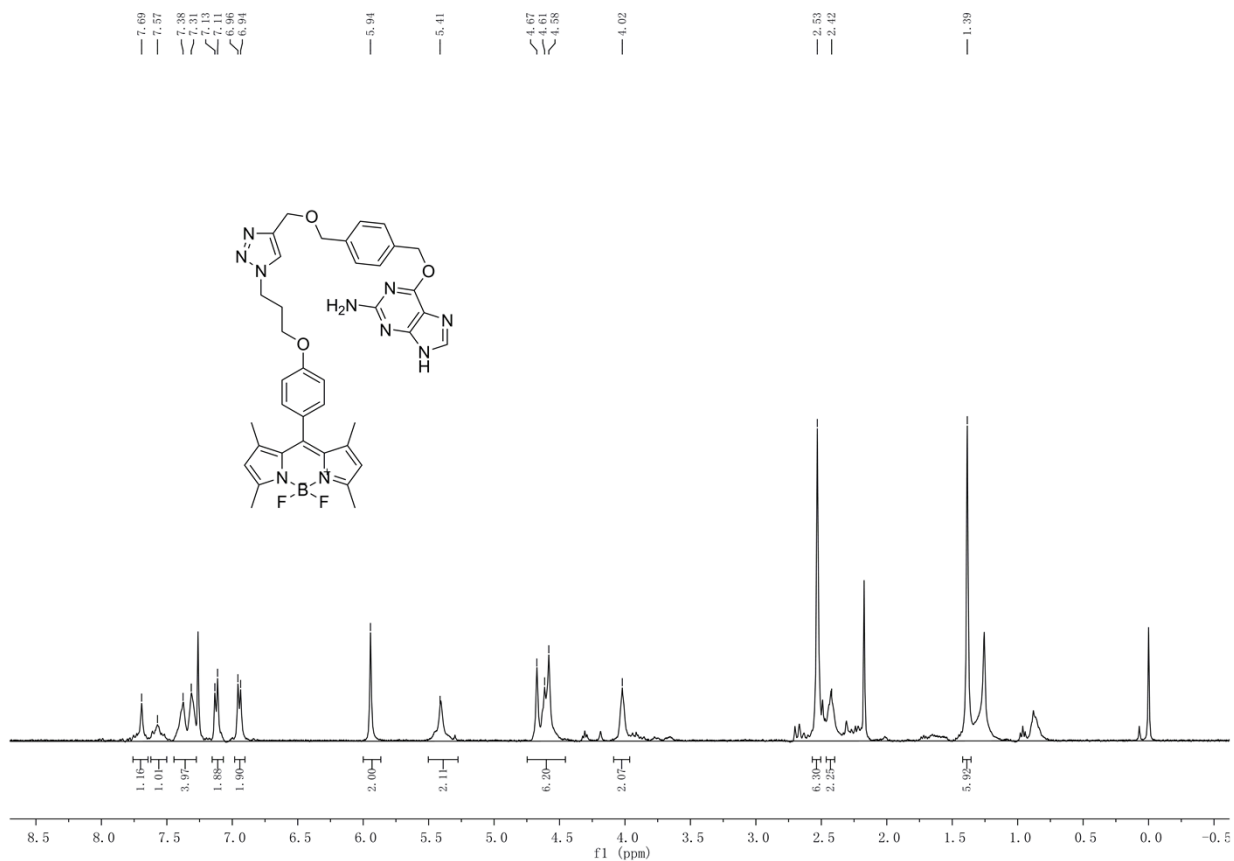

Figure 7. PYBG-BODIPY <sup>1</sup>H NMR

| SAMPLE INFORMATION |                                                                           |                     |                             |
|--------------------|---------------------------------------------------------------------------|---------------------|-----------------------------|
| Sample Name:       | sxb                                                                       | Acquired By:        | System                      |
| Sample Type:       | Unknown                                                                   | Sample Set Name:    | 15020401                    |
| Vial:              | 14                                                                        | Acq. Method Set:    | 6                           |
| Injection #:       | 1                                                                         | Processing Method:  | 2, 3                        |
| Injection Volume:  | 1.00 ul                                                                   | Channel Name:       | 280.0nm, 290.0nm, 500.0nm   |
| Run Time:          | 30.0 Minutes                                                              | Proc. Chnl. Descr.: | PDA 280.0 nm, PDA 290.0 nm, |
| Date Acquired:     | 2/4/2015 9:43:12 PM CST                                                   | Project Name:       | H150115 Channel Id 1405     |
| Date Processed:    | 2/5/2015 8:51:19 AM CST, 2/5/2015 8:51:48 AM CST, 2/5/2015 8:52:09 AM CST |                     |                             |

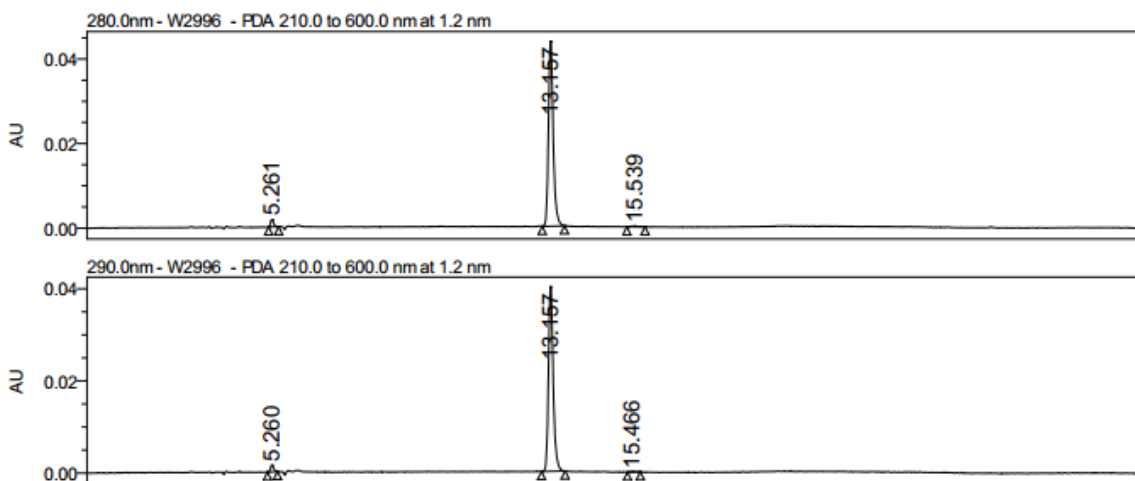



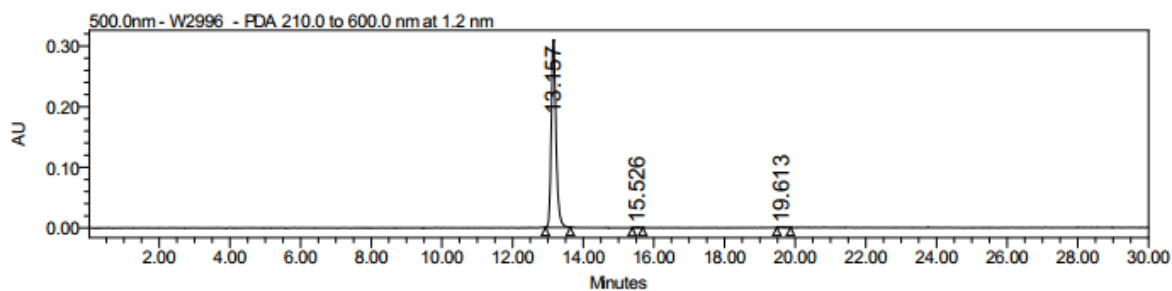

**Processed Channel Descr.: PDA 280.0 nm**

|   | Processed Channel Descr. | RT     | Area   | % Area | Height |
|---|--------------------------|--------|--------|--------|--------|
| 1 | PDA 280.0 nm             | 5.261  | 10630  | 2.52   | 1710   |
| 2 | PDA 280.0 nm             | 13.157 | 408908 | 96.80  | 44082  |
| 3 | PDA 280.0 nm             | 15.539 | 2898   | 0.69   | 184    |

**Processed Channel Descr.: PDA 290.0 nm**

|   | Processed Channel Descr. | RT    | Area | % Area | Height |
|---|--------------------------|-------|------|--------|--------|
| 1 | PDA 290.0 nm             | 5.260 | 9231 | 2.40   | 1485   |

**Processed Channel Descr.: PDA 290.0 nm**

|   | Processed Channel Descr. | RT     | Area   | % Area | Height |
|---|--------------------------|--------|--------|--------|--------|
| 2 | PDA 290.0 nm             | 13.157 | 373756 | 97.19  | 40375  |
| 3 | PDA 290.0 nm             | 15.466 | 1579   | 0.41   | 127    |

**Processed Channel Descr.: PDA 500.0 nm**

|   | Processed Channel Descr. | RT     | Area    | % Area | Height |
|---|--------------------------|--------|---------|--------|--------|
| 1 | PDA 500.0 nm             | 13.157 | 2887604 | 99.43  | 310759 |
| 2 | PDA 500.0 nm             | 15.526 | 7639    | 0.26   | 891    |
| 3 | PDA 500.0 nm             | 19.613 | 8799    | 0.30   | 823    |

Figure 8.HPLC spectrum PYBG-BODIPY

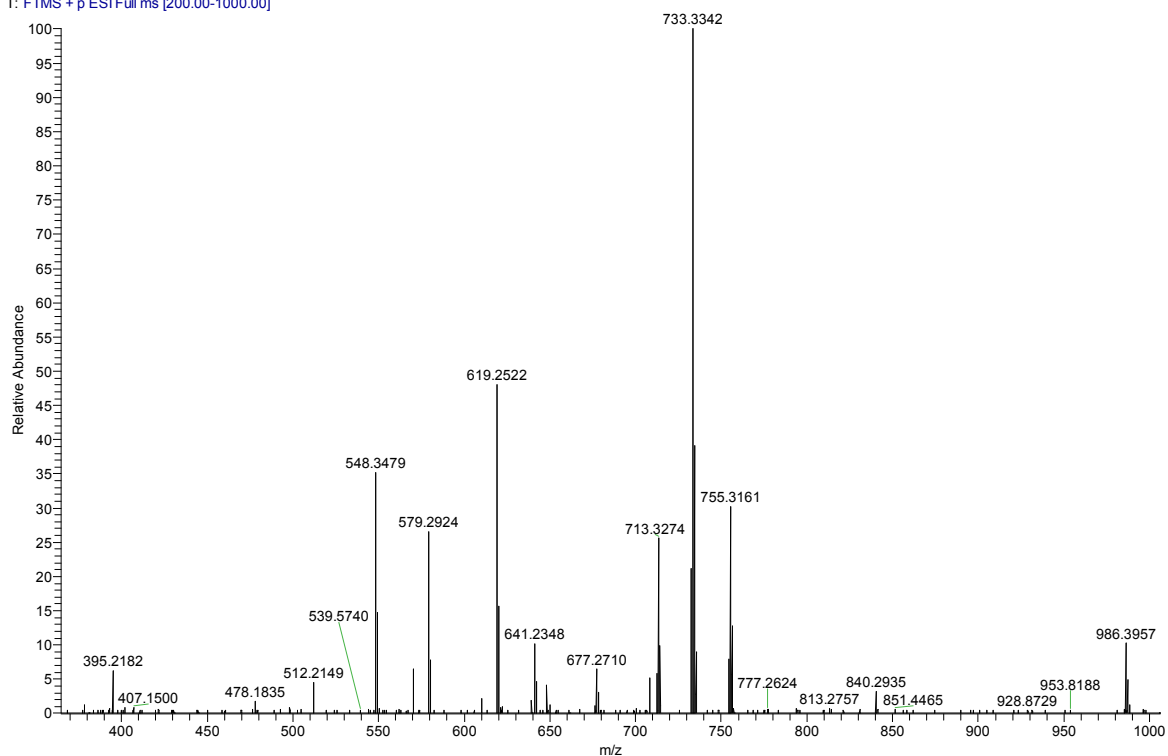

Figure 9.ESI ms Spectrum PYBG-BODIPY

- 1 G. Lemerrier, S. Gendreizig, M. Kindermann, K. Johnsson, *Angew. Chem. Int. Ed. Engl.* **2007**, *46*, 4281-4284.
- 2 A. Keppler, S. Gendreizig, T. Gronemeyer, H. Pick, H. Vogel and K. Johnsson, *Nat. Biotechnol.*, 2003, *21*, 86.
- 3 H. Yu, Y. Xiao, H. Guo, *Org. Lett.* 2012, *14*, 2014-2017.
- 4 M. Yuan, X. Yin, H. Zheng, C. Ouyang, Z. Zuo, H. Liu, Y. Li, *Chemistry – An Asian Journal* 2009, *4*, 707-713.
- 5 T. Elisa, M. N. Elizabeth, J. Jacek, J. L. Stephen, *J. Am. Chem. Soc.* 20 08, *130*, 15776-15777.
- 6 D. Srikun, A. E. Albers, C. I. Nam, A. T. Iavarone and C. J. Chang, *J. Am. Chem. Soc.*, 2010, *132*, 4455-4465.
